# Supplementary material for: Interactive, integrated analysis of single-cell transcriptomic and phylogenetic data with PhyloVision
Source: Cell Rep Methods. 2022 Apr 25;2(4):100200. doi: 10.1016/j.crmeth.2022.100200 (PMC9046453; doi:10.1016/j.crmeth.2022.100200)
Supplement: Document S1. Figures S1–S4 [file mmc1.pdf]

**Cell Reports Methods, Volume 2**

**Supplemental information**

**Interactive, integrated analysis of single-cell  
transcriptomic and phylogenetic data with PhyloVision**

**Matthew G. Jones, Yanay Rosen, and Nir Yosef**

## **SUPPLEMENTARY FIGURES AND LEGENDS**

Toggling layouts allows users to view the tree radially (as shown), or linearly.

Users can specify a depth at which to collapse the tree. For example, collapsing to depth 3 would collapse all edges to an LCA of depth 3 from the root.

Selecting “Expand All” uncollapses all edges.

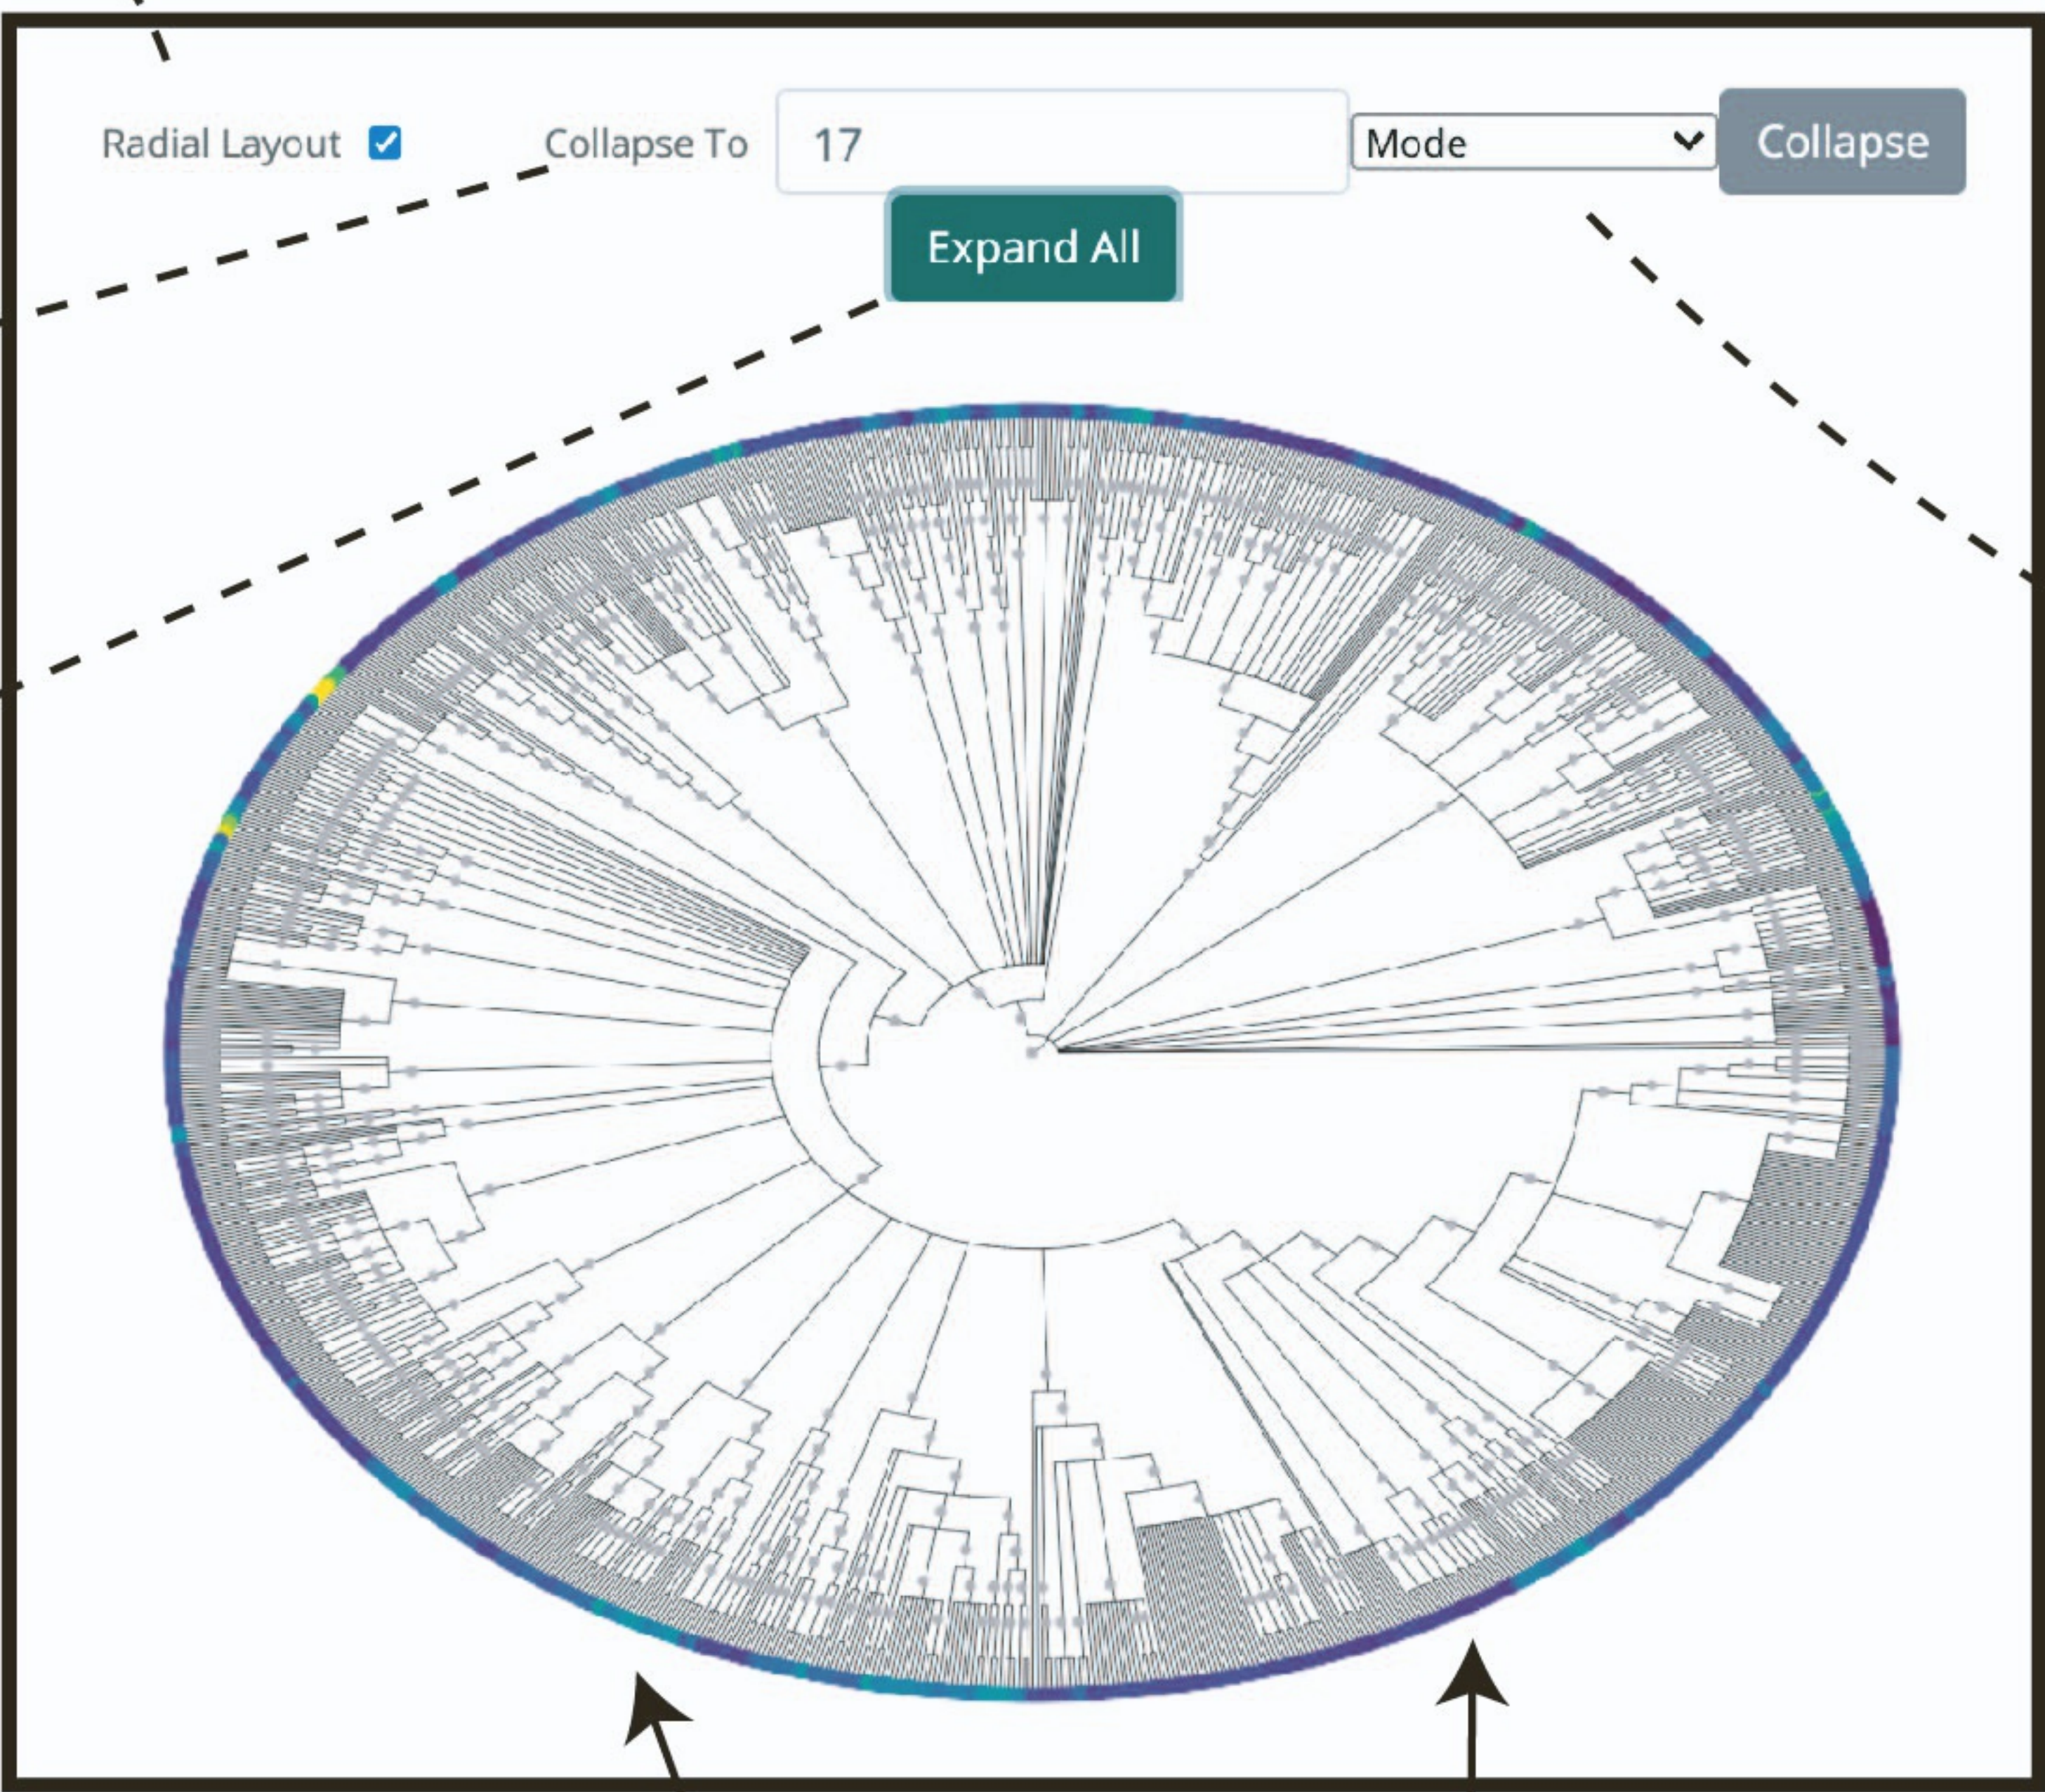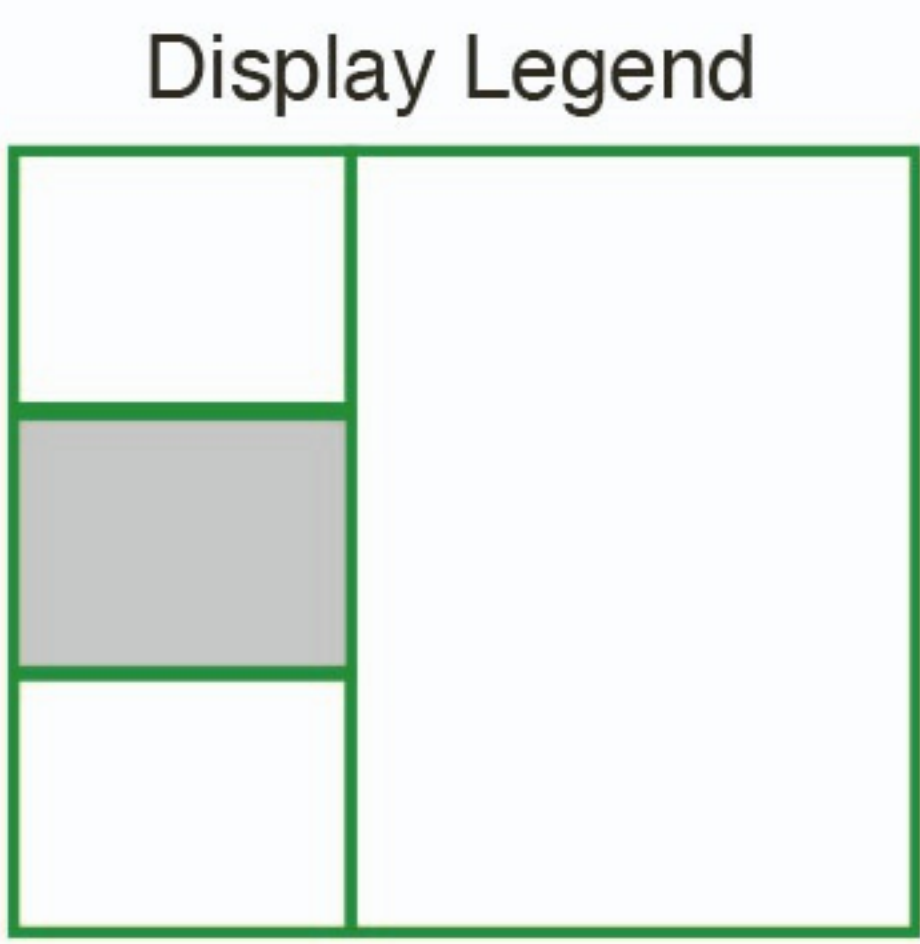

Users can specify how to compute a value for a collapsed node. Users can choose between mode, arithmetic mean, geometric mean, and median.

Colors plotted on each node correspond to the selected variable in the control panel

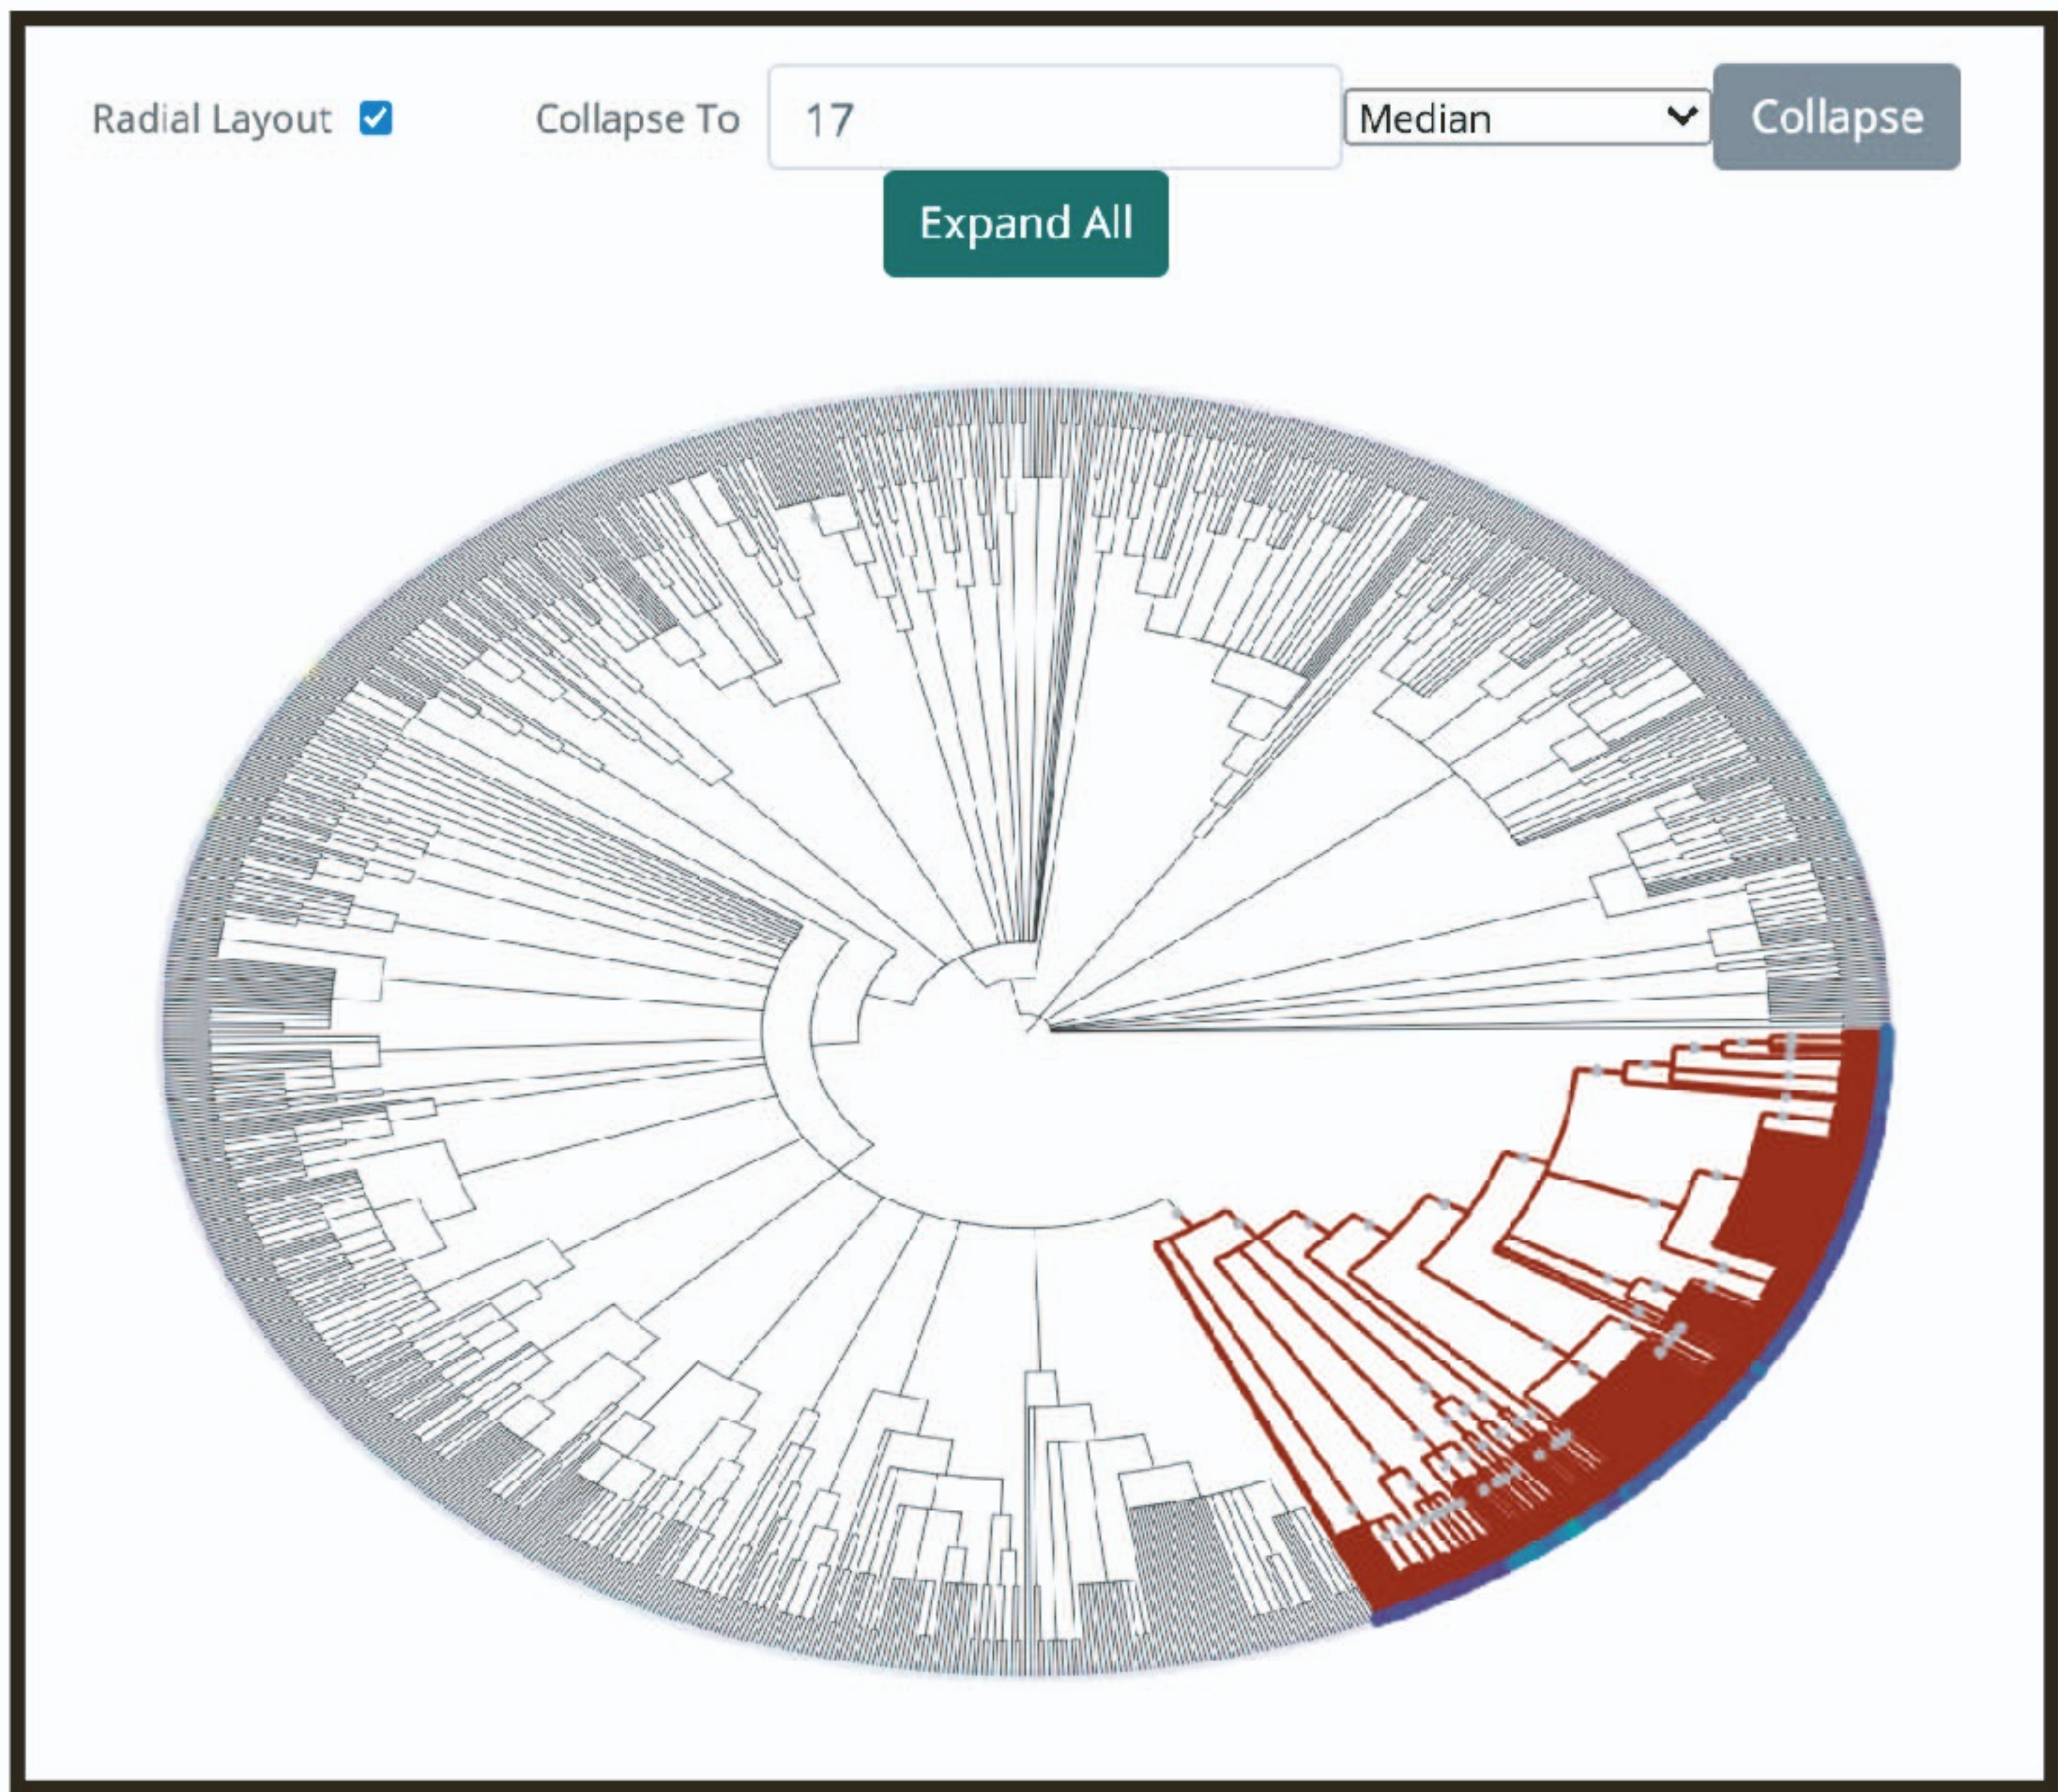

Clades can be selected by clicking with the left-mouse button on an internal node. These selections can be propagated to the cell projection viewer or the differential expression analysis tool.

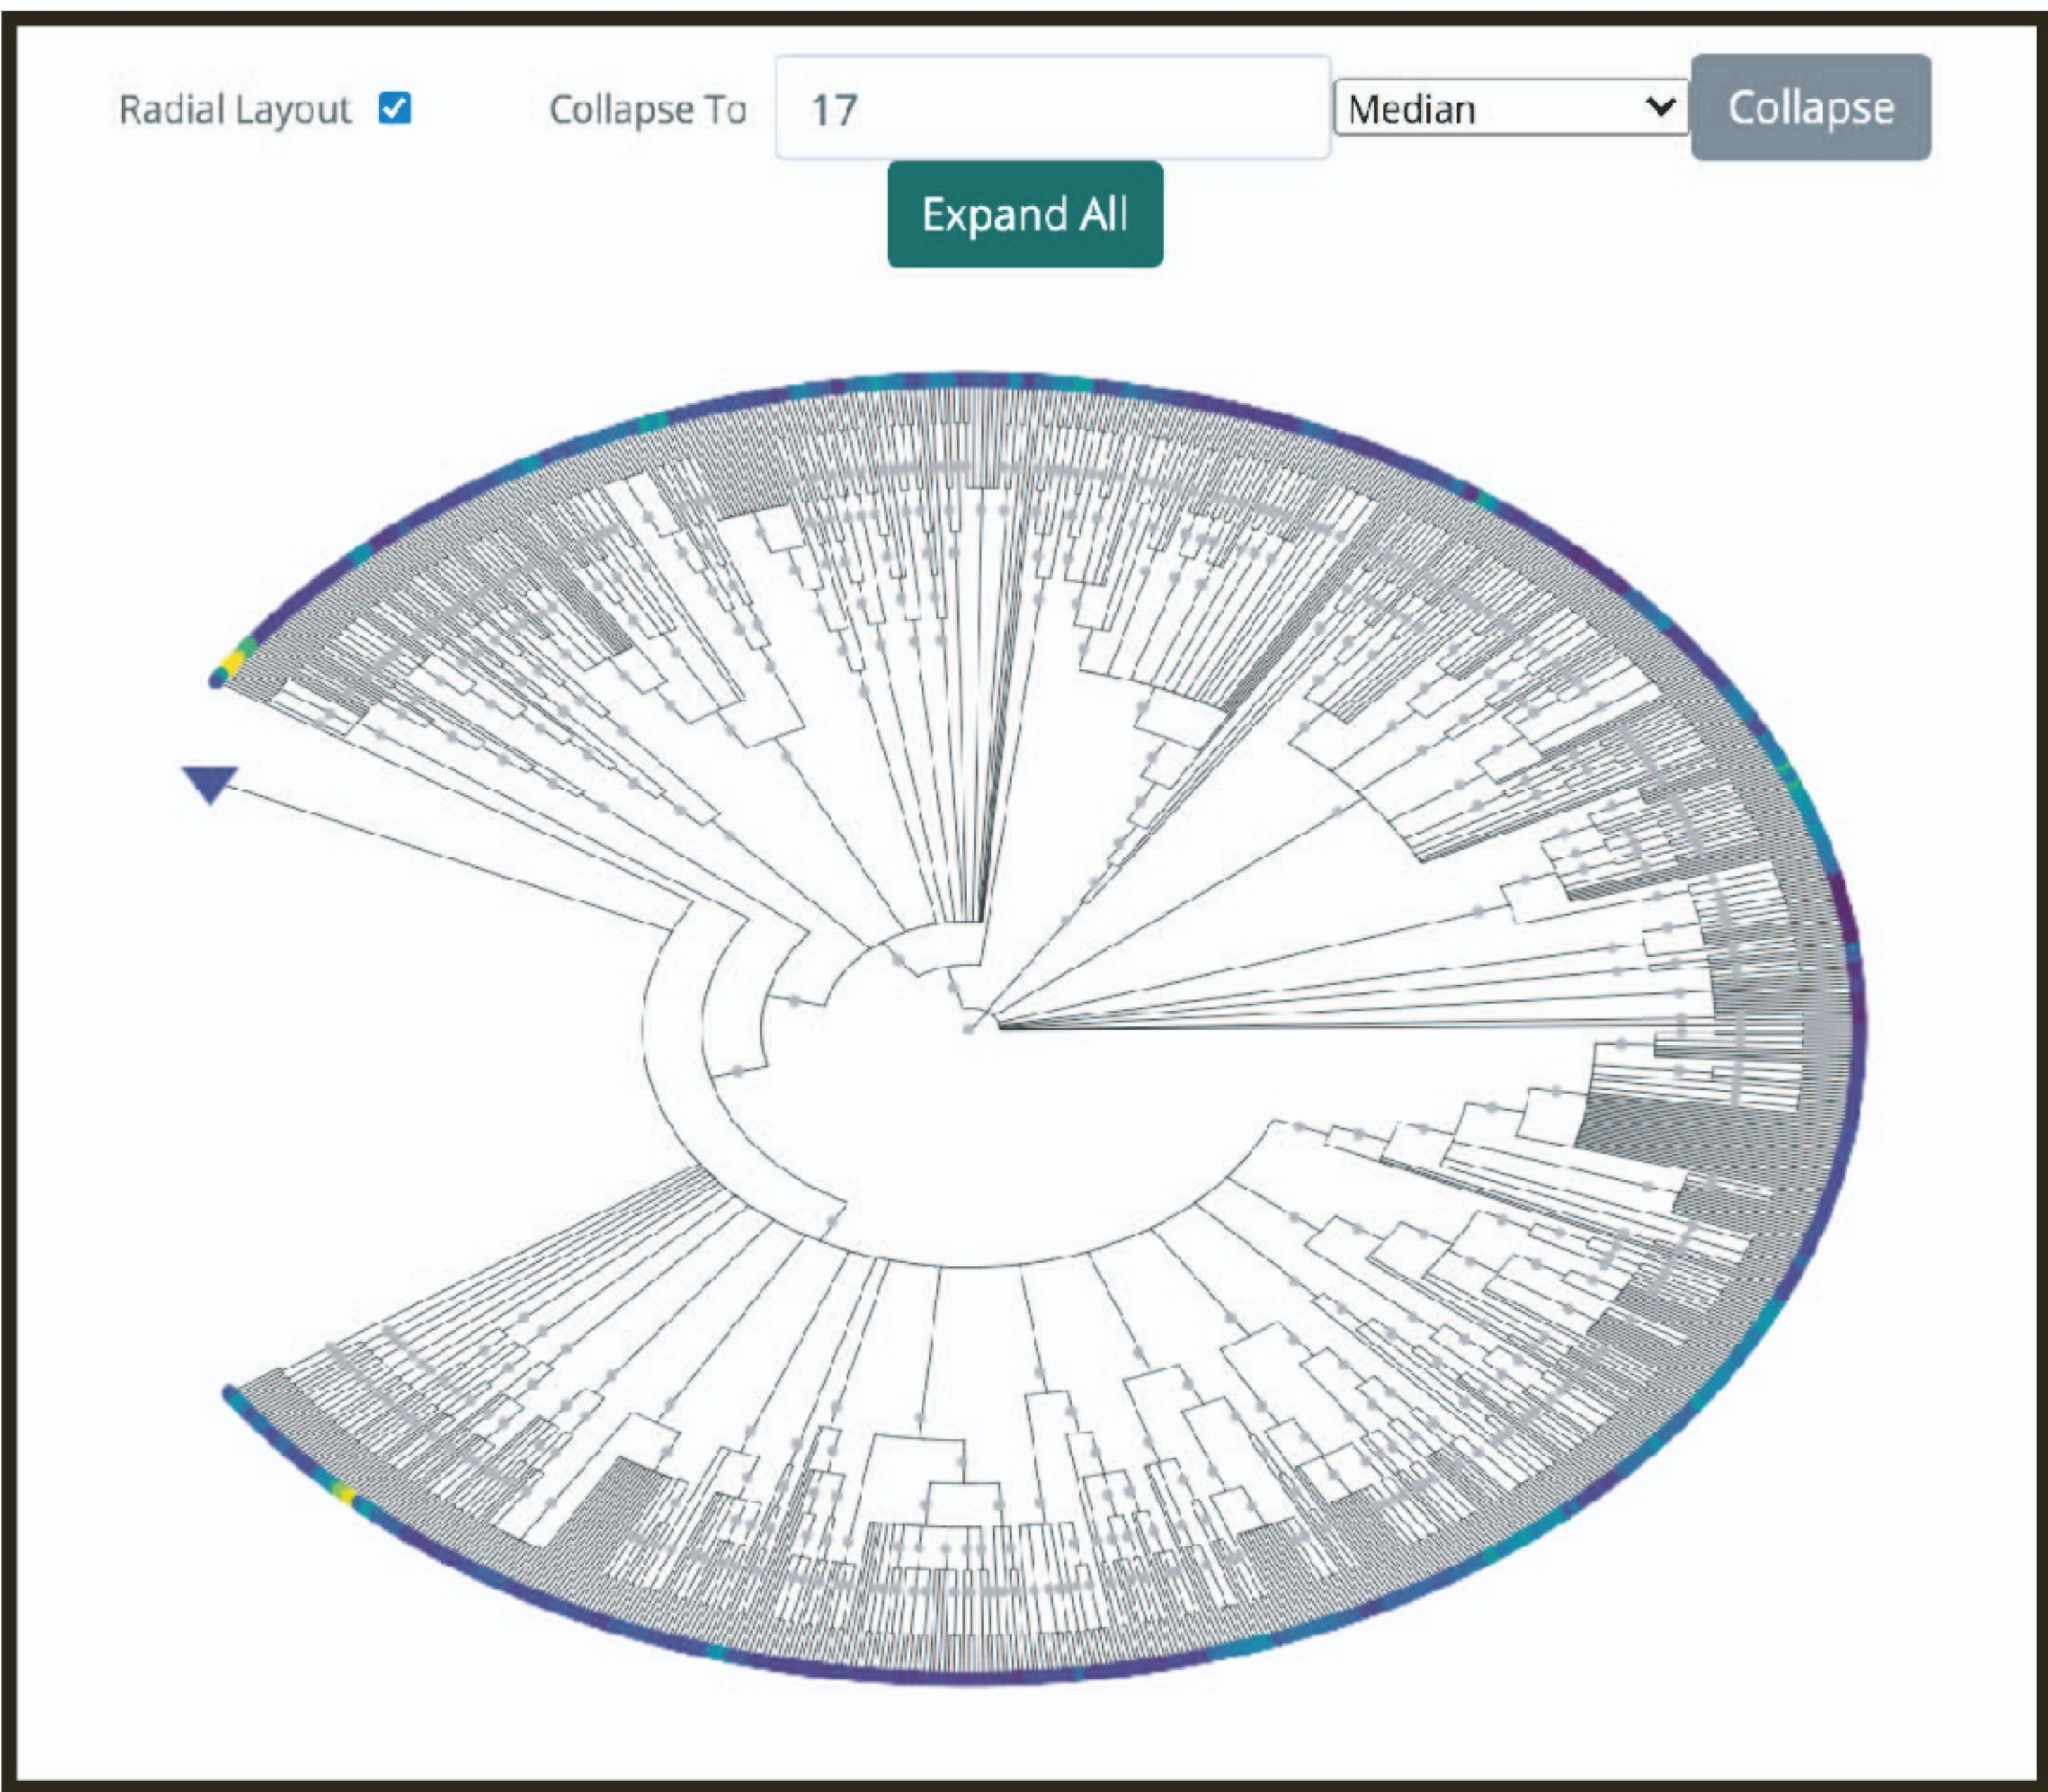

Clades can be collapsed individually by clicking with the right-mouse button on an internal node. Values displayed will be computed using the specified function (e.g., median)

**Figure S1: Elements of the PhyloPlot interface, related to Figure 1.** A tutorial over the features of the PhyloPlot.js interface used in the *PhyloVision* web-based report. Screenshots indicate how to interact with the object, including how to select, collapse, and expand clades.

“Hotspot” mode can be selected in the top right corner of the web-report

Display Legend

Signature Autocorrelation

Hotspot

The control panel in “Hotspot” mode contains drop down panels for each Hotspot gene module identified.

sampleID

Signatures Modules Genes DE

Filter Signatures...

HOTSPOT\_TREE\_1

Overlap

Liv

LL

M1

M2

RE

RW

HOTSPOT\_TREE\_3

5.7

\*

\*

\*

\*

\*

HOTSPOT\_TREE\_2

5.3

\*

\*

\*

\*

\*

Clicking on the arrow next to a module reveals a table with entries for each signature that significantly overlaps with the module

Filter Signatures...

|                                                                      | Overlap | Liv | LL | M1 | M2 | RE | RW |
|----------------------------------------------------------------------|---------|-----|----|----|----|----|----|
| HOTSPOT_TREE_1                                                       | 5.1     | *   | *  | *  | *  | *  | *  |
| REACTOME_ENDOSOMAL_TRANSPORT                                         | 4.5     | *   | *  | *  | *  | *  | *  |
| UOLAR_PATHWAY_G                                                      | 4.5     | *   | *  | *  | *  | *  | *  |
| OTSPOT_TREE_1                                                        | 4.5     | *   | *  | *  | *  | *  | *  |
| YANG_MUC2_TARGETS_DUODE                                              | 4.2     | *   | *  | *  | *  | *  | *  |
| NUM_SMO_UP_OVERLAP_HOTSPOT_TREE_1                                    | 4.2     | *   | *  | *  | *  | *  | *  |
| SOURCEC_MYC_TARGETS_OVERLAP_HOTSPOT_TREE_1                           | 4.2     | *   | *  | *  | *  | *  | *  |
| GO_INNATE_IMMUNE_RESPONSE_IN_MUCOSA_OVERLAP_HOTSPOT_TREE_1           | 4.2     | *   | *  | *  | *  | *  | *  |
| GO_PROTEIN_TRANSPORT_INT_O_M                                         | 4.2     | *   | *  | *  | *  | *  | *  |
| MEMBRANE_RAFT_OVERLAP_HOTSPOT_TREE_1                                 | 4.1     | *   | *  | *  | *  | *  | *  |
| RICKMAN_HEAD_AND_NECK_CANCER_D_OVERLAP_HOTSPOT_TREE_1                | 4.1     | *   | *  | *  | *  | *  | *  |
| MALIK_REPRESSED_BY_ESTROGEN_OVERLAP_HOTSPOT_TREE_1                   | 4.1     | *   | *  | *  | *  | *  | *  |
| GO_MAINTENANCE_OF_GASTROINTESTINAL_EPITHELIUM_OVERLAP_HOTSPOT_TREE_1 | 4.1     | *   | *  | *  | *  | *  | *  |
| FUJIWARA_PARK2_HEPATOCYTE_PROLIFERATION_UP_OVERLAP_HOTSPOT_TREE_1    | 4.0     | *   | *  | *  | *  | *  | *  |
| LUDWICZEK_TREATING_IRON_OVERLOAD_OVERLAP_HOTSPOT_TREE_1              | 4.0     | *   | *  | *  | *  | *  | *  |

The values in the first column, labeled “Overlap” display the enrichment statistic between the genes in the Hotspot module and signature

Clicking on a row displays the signature score on the cell-projection and tree. In Hotspot mode, signature scores are computed on the overlapping genes.

Hovering over a cell displays its enrichment statistic and FDR-corrected p-value.

Additional columns show the result of 1 vs. All differential signature tests for the selected grouping variable.

sampleID

Signatures Modules Genes DE

Show 10 entries

| Module         | C      | P      | FDR    |
|----------------|--------|--------|--------|
| HOTSPOT_TREE_1 | 0.3765 | 0.0003 | 0.0115 |
| HOTSPOT_TREE_3 | 0.3093 | 0.0003 | 0.0115 |
| HOTSPOT_TREE_2 | 0.2209 | 0.0007 | 0.0123 |

Showing 1 to 3 of 3 entries

PreviousNext

Hotspot module statistics can be viewed under the “Modules” tab.

The Geary’s C, p-value, and FDR value are displayed for each module.

The number of modules per page can be selected.

Gene expression can be overlaid onto the tree and two-dimensional embedding.

Genes can be selected via the dropdown menu.

Recently used genes can be selected under the “Recent Genes” list.

A differential expression analysis can be conducted under the “DE” tab. Various tests can be selected under “Advanced Options.”

A selected group can be compared against another group, or the remainder of cells if no group is specified.

sampleID

Signatures Modules Genes DE

Gene: IFI6

Recent Genes:

IFI6

sampleID

Signatures Modules Genes DE

Group

Selections

Foreground

Current

Background

Remainder

Calculate DE

Advanced Options

**Figure S2: Elements of the *Hotspot* mode control panel, related to Figure 1.** Users can toggle between signature autocorrelation and *Hotspot* modes in the top-right corner of the web-based report. In *Hotspot* mode, each module is presented in a collapsable table. Elements in the table are gene signatures that significantly overlap with the *Hotspot* module (see Methods). Users can also view the *Hotspot* summary statistics with the “Modules” tab, where the Geary’s C, p-values, and FDR of each module are displayed. Users can also select specific genes for displaying on the phylogeny and scatter plot, as well as perform differential expression tests. Multiple differential expression tests are supported under “Advanced Options”.

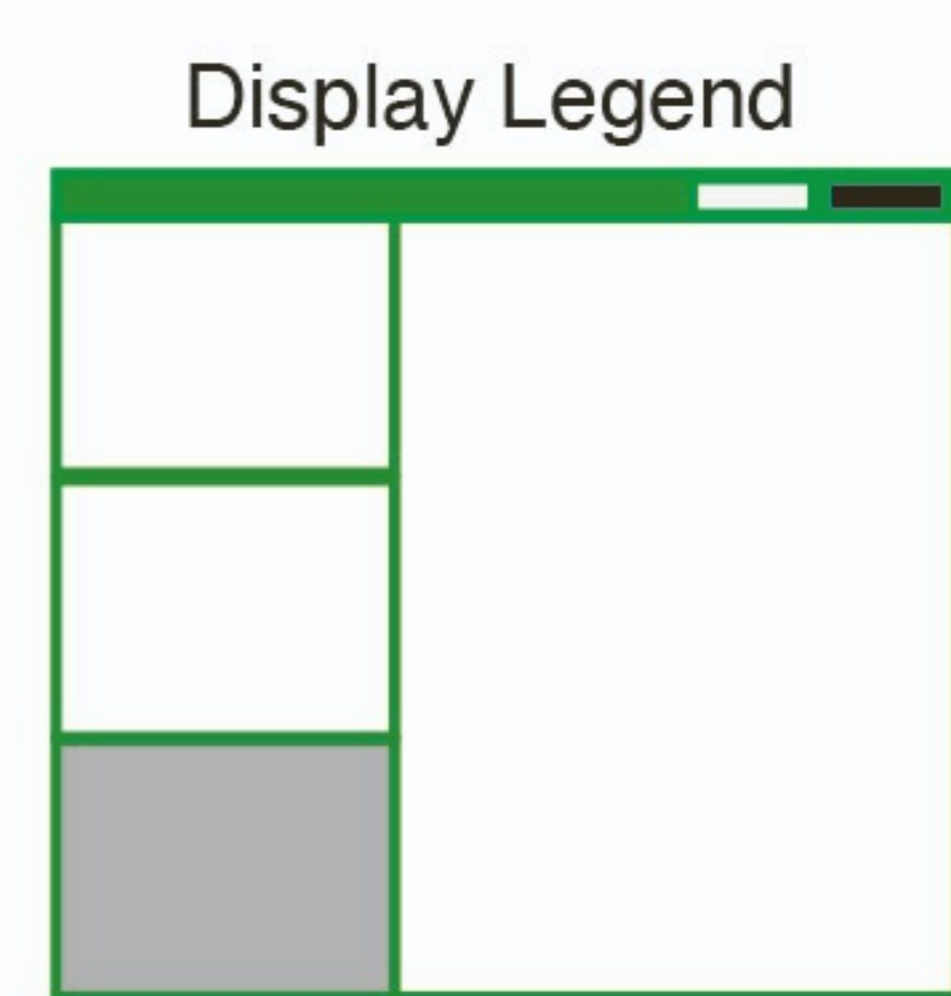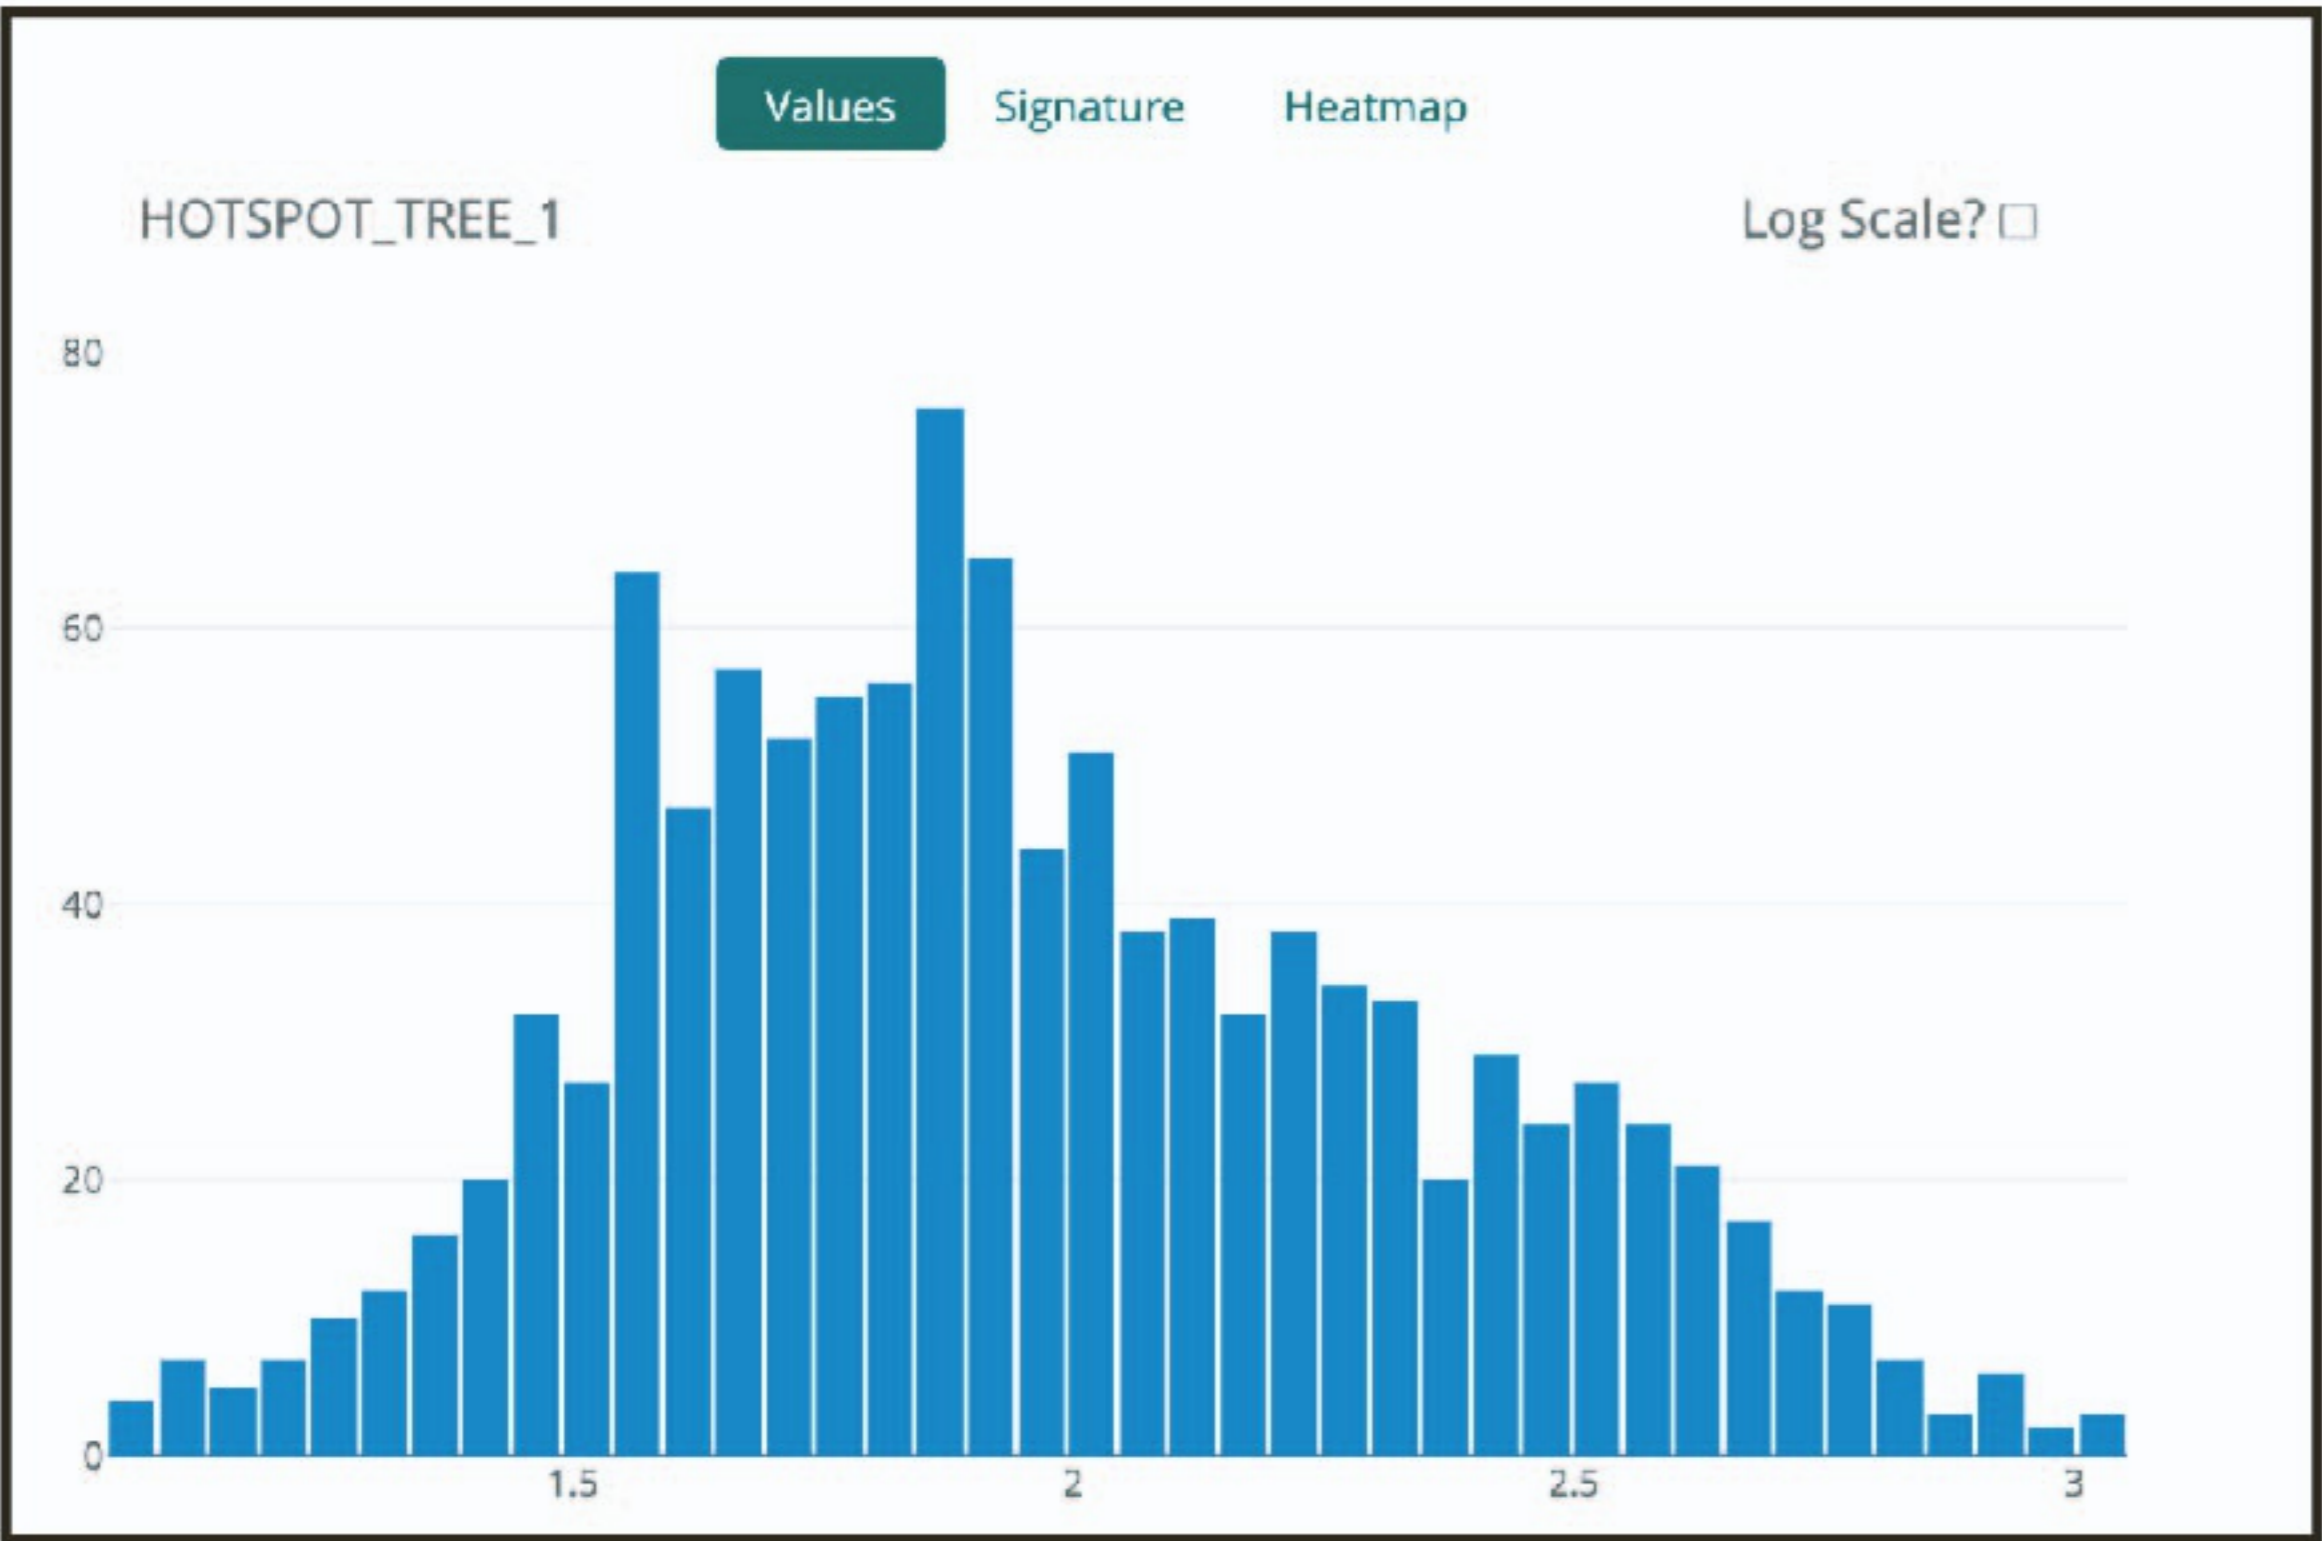

When selecting a Hotspot module, the exploration panel displays the distribution of scores.

Selecting the “log scale” radio button shows the logged distribution.

Values

Signature

Heatmap

Signature:

HOTSPOT\_TREE\_1

Source:

Hotspot

| Gene    | Info        | Sign | Score |
|---------|-------------|------|-------|
| CEACAM6 | <genecards> | +    | 1.17  |
| MUC5AC  | <genecards> | +    | 1.16  |
| TFF3    | <genecards> | +    | 1.10  |
| TFF1    | <genecards> | +    | 1.00  |
| GPX2    | <genecards> | +    | 0.74  |

Showing 1 to 196 of 196 entries

The “Signature” tab shows the genes in the Hotspot gene module.

Clicking on a gene name displays the counts on the cell-projection and tree.

Clicking on “genecards” directs the user to the gene-card entry for the gene of interest

Values

Signature

Heatmap

Signature:

REACTOME\_ENDOSOMAL\_VACUOLAR\_PATHWAY\_OVERLAP\_HOTSPOT\_TREE\_1

Source:

c2.all.v6.0.symbols.gmt

| Gene  | Info        | Sign | Score |
|-------|-------------|------|-------|
| B2M   | <genecards> | +    | 1.65  |
| HLA-C | <genecards> | +    | 1.02  |
| HLA-B | <genecards> | +    | 0.94  |
| CTSS  | <genecards> | +    | 0.41  |

Showing 1 to 4 of 4 entries

If a signature is selected in the Hotspot mode, the overlapping genes are dispalyed in the “Signature” information tab.

**Figure S3: Elements of the *Hotspot* mode signature exploration panel, related to Figure 1.** Users can view the distribution of scores in the *Hotspot* mode on both normal and log scales. If the *Hotspot* module is selected, scores are the *VISION*-computed score for the genes in the *Hotspot* module. If a signature is selected, the distribution displayed is the signature score of only the genes overlapping between the *Hotspot* module and the gene signature. Users can also view the genes in a *Hotspot* module, or in the overlap between a gene signature and *Hotspot* module.

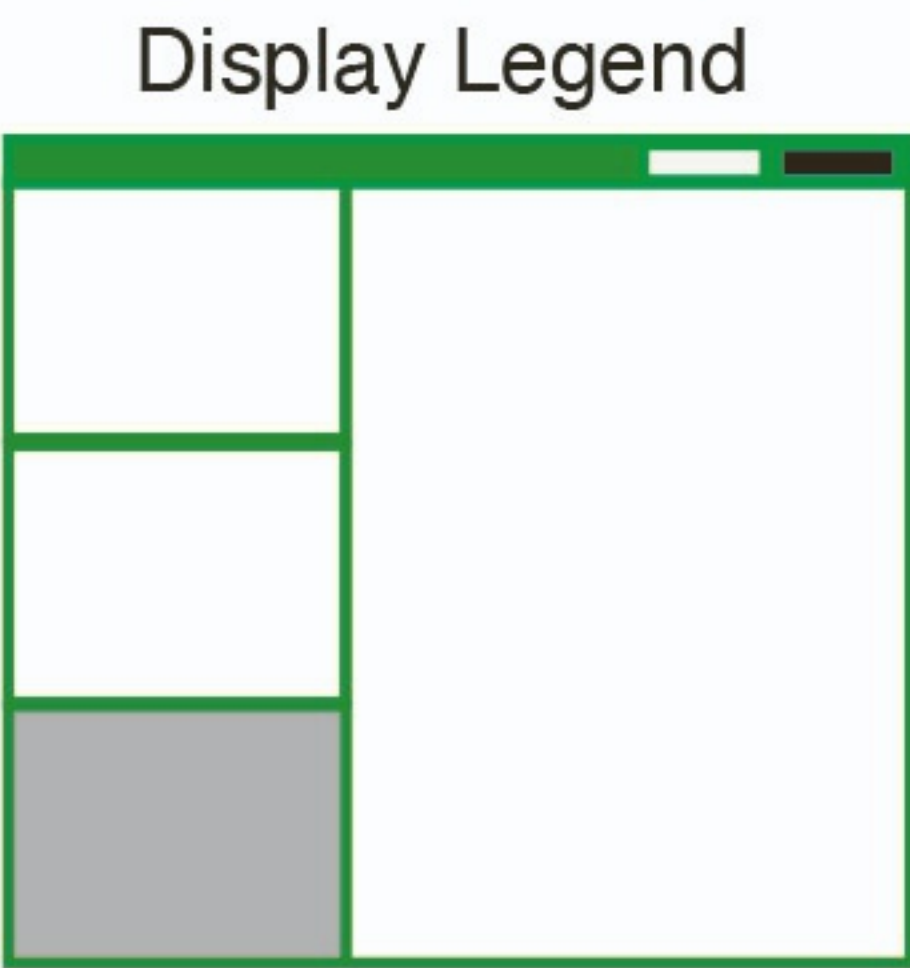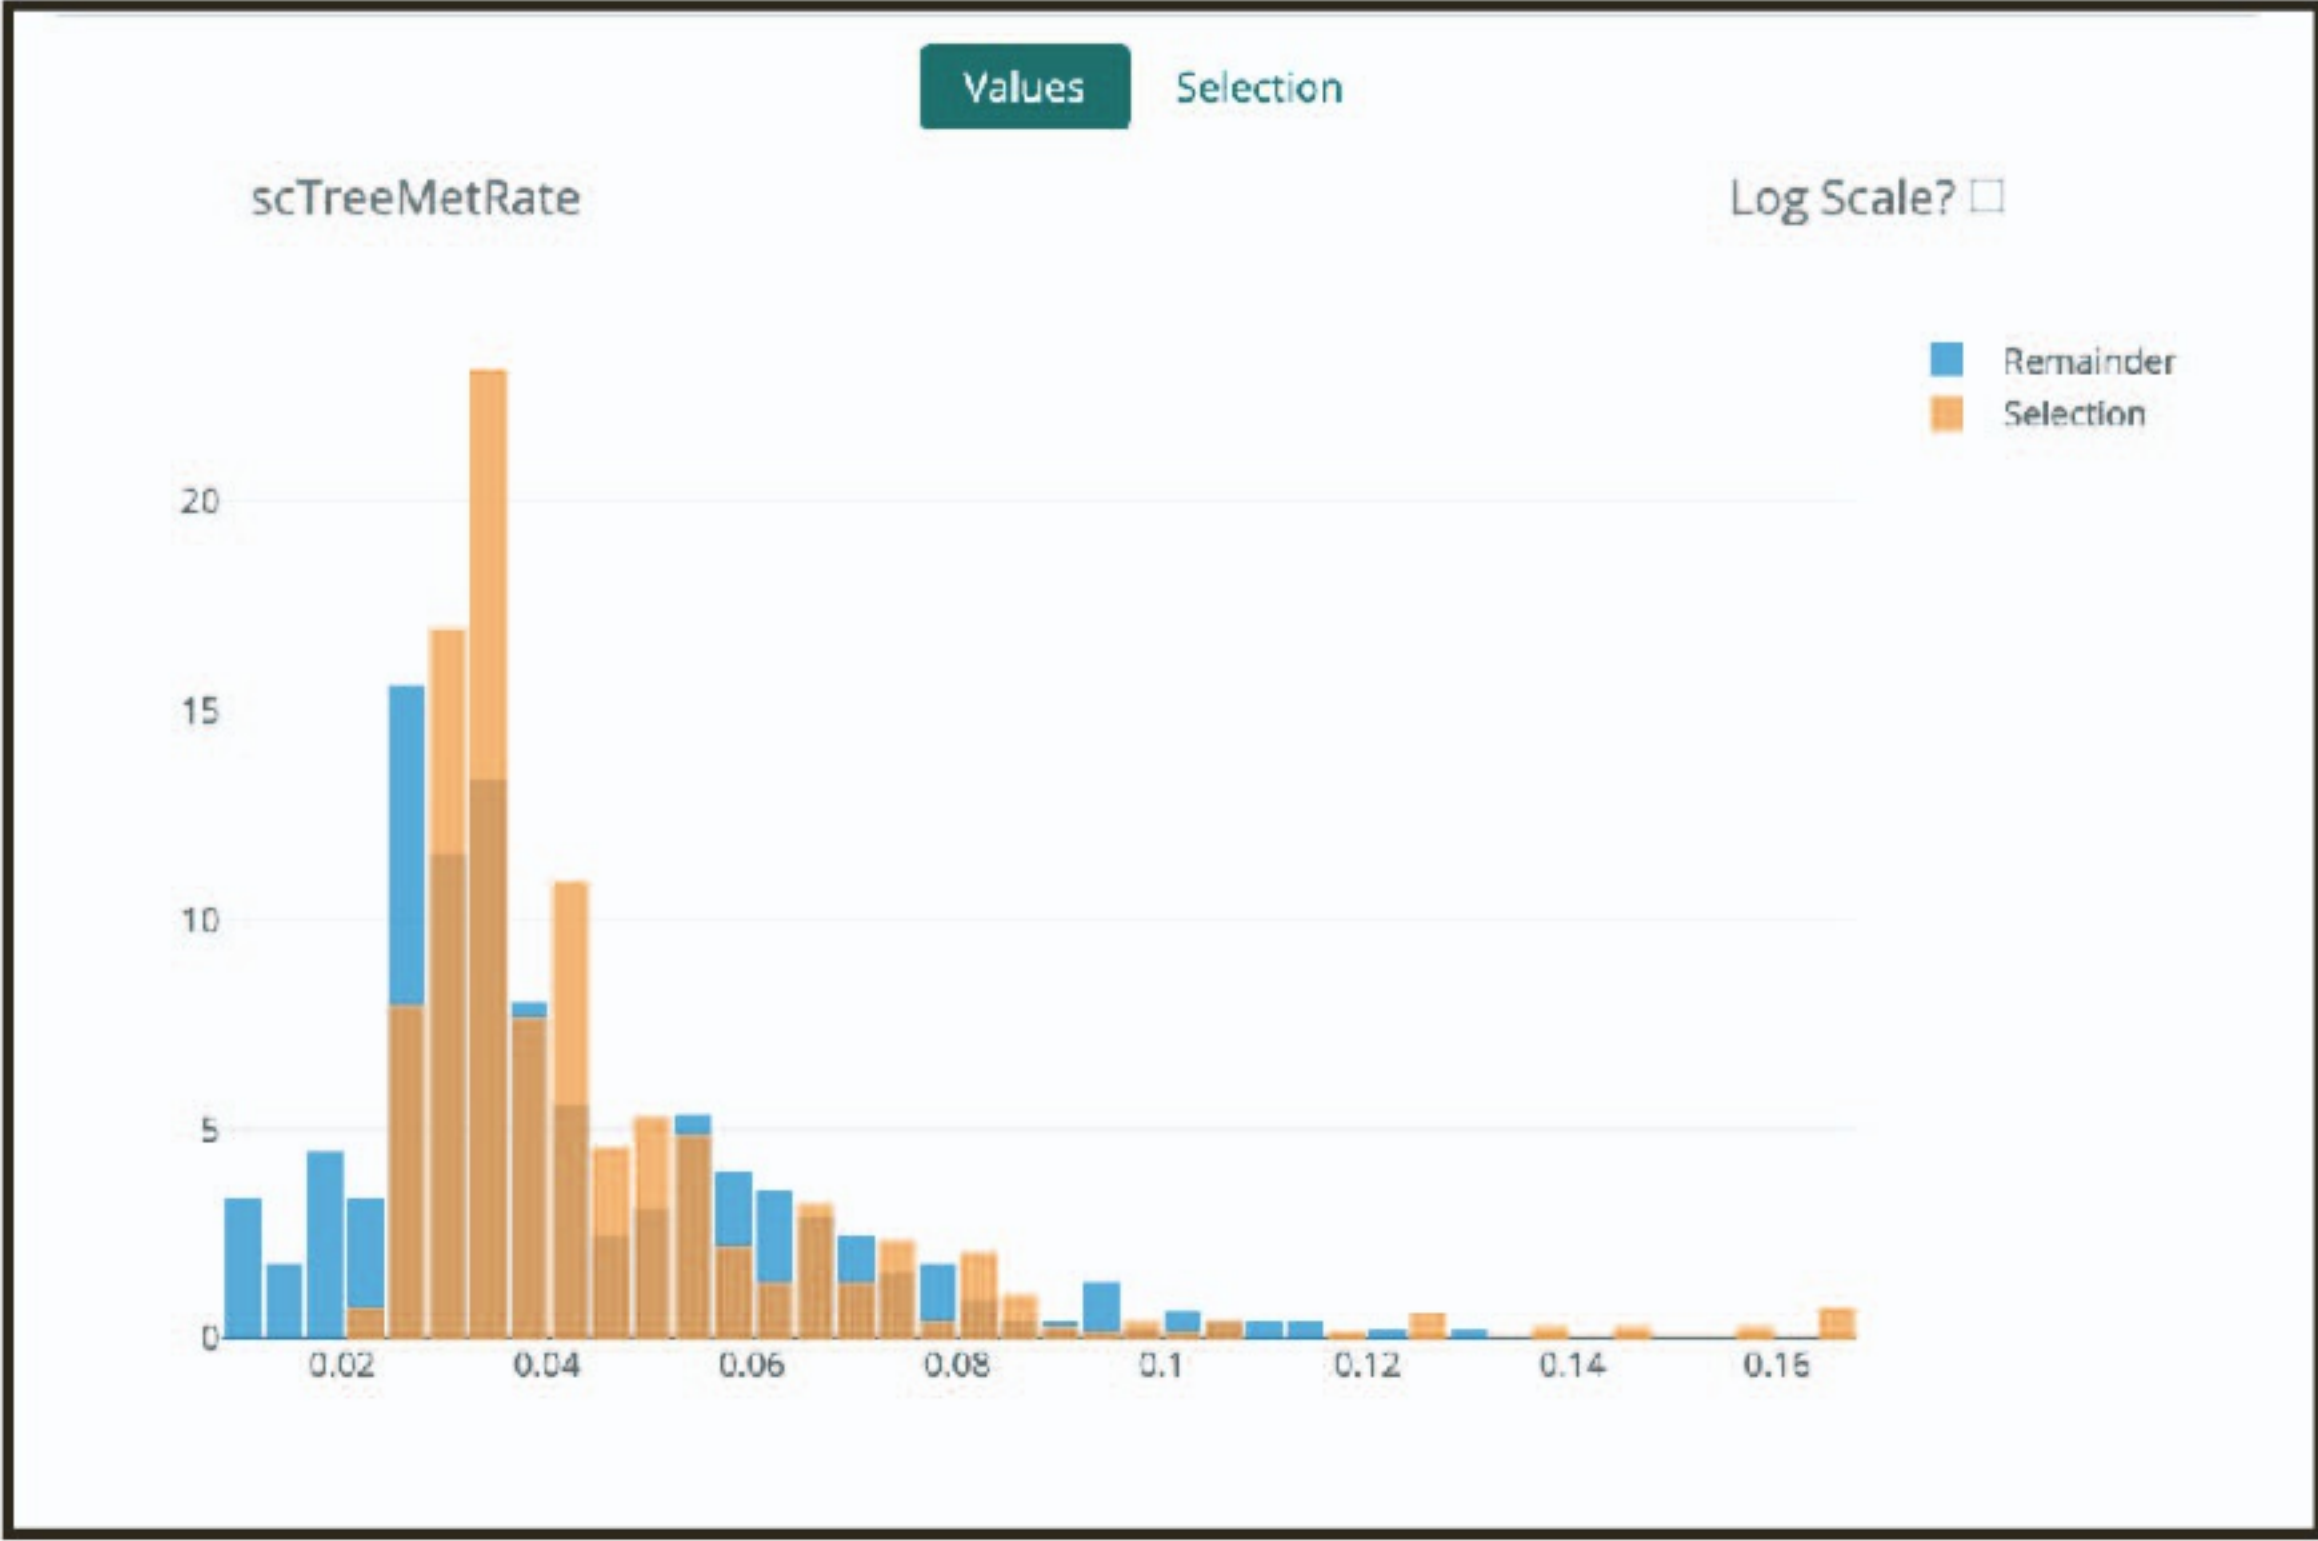

If a cell selection is active, the “Values” distribution will show two distributions: one for the selected cells (orange) and one for the rest of the cells (blue).

Values Selection

Cells Selected: 678 [Download](#)

| Numeric Variables | Min     | Median  | Max     |
|-------------------|---------|---------|---------|
| LineageGroup      | 4       | 4       | 4       |
| nGenes            | 317     | 1860    | 5655    |
| NUM_INTBC         | 2       | 7       | 22      |
| nUMI              | 2061    | 7016    | 52090   |
| scTreeMetRate     | 0.02185 | 0.03641 | 0.1677  |
| StaticMetScore    | 0.7626  | 0.7626  | 0.7626  |
| TissueDispersion  | 0.7626  | 0.7626  | 0.7626  |
| TreeMetRate       | 0.05845 | 0.05845 | 0.05845 |
| TS_UMI            | 10      | 61      | 675     |

| Categorical Variables | Top Value | Percent | Entropy |
|-----------------------|-----------|---------|---------|
| VISION_Clusters_Tree  | Cluster 6 | 34.2%   | 2.279   |
| Sample2               | M         | 64.5%   | 1.231   |
| sampleID              | M1        | 40.9%   | 2.023   |

The “Selection” tab will show a breakdown of meta data within the selected cell population.

Summary statistics are shown for numerical meta data.

The most frequent category, percentage of cells reporting this category, and entropy of the variable are shown for categorical meta data.

A list of selected calls can be downloaded with the arrow button next to “Cells Selected”.

| Categorical Variables | Top Value  | Percent | Entropy |
|-----------------------|------------|---------|---------|
| VISION_Clusters_Tree  | Cluster 6  | 34.2%   | 2.279   |
| VISION_Clusters_Tree  |            |         |         |
|                       | Cluster 6  | 34.2%   |         |
|                       | Cluster 10 | 30.5%   |         |
|                       | Cluster 7  | 11.2%   |         |
|                       | Cluster 9  | 8.7%    |         |
|                       | Cluster 5  | 8.6%    |         |
|                       | Cluster 8  | 6.8%    |         |

Clicking on an arrow next to a categorical variable reveals a more granular breakdown of the composition of a given selection of cells.

**Figure S4: Investigating cell selections, related to Figure 1.** Users can investigate a selection with respect to its distribution of the plotted value as compared to the background (i.e., non-selected cells). *PhyloVision*'s UI also provides a breakdown of metadata within a given selection, including summary statistics over numerical metadata as well as measures of entropy and composition of categorical metadata.
